# Supplementary material for: Probiotics in the prevention of eczema: a randomised controlled trial
Source: PubMed Central journal article supplement — Arch Dis Child. 2014 Jun 19;99(11):1014–9. doi: 10.1136/archdischild-2013-305799 (PMC4215350; doi:10.1136/archdischild-2013-305799), 2014-06-19
Supplement: archdischild-2013-305799-s1.pdf [file archdischild-2013-305799-s1.pdf]

**Webtable 1: Outcomes in high risk infants according to intervention group**

| Variable                                                        | Probiotic arm   | Placebo arm     | OR (95% CI)       | P value* |
|-----------------------------------------------------------------|-----------------|-----------------|-------------------|----------|
| <b>Primary outcome</b>                                          |                 |                 |                   |          |
| Diagnosed eczema at 2 years                                     | 65/179 (36.3%)  | 65/183 (35.5%)  | 1.04 (0.67-1.59)  | 0.88     |
| SPT <sup>†</sup> positive at 6 m                                | 6/129 (4.7%)    | 13/122 (10.7%)  | 0.41 (0.15-1.11)  | 0.072    |
| • cows' milk                                                    | 0/126 (0.0%)    | 5/122 (4.1%)    | -                 | 0.028    |
| • egg                                                           | 5/126 (4.0%)    | 12/122 (9.8%)   | 0.38 (0.13-1.11)  | 0.081    |
| • house dust mite                                               | 1/129 (0.8%)    | 0/122 (0.0%)    | -                 | 0.49     |
| • cat                                                           | 0/129 (0.0%)    | 1/122 (0.8%)    | -                 | 0.49     |
| • grass                                                         | 1/129 (0.8%)    | 0/122 (0.0%)    | -                 | 0.49     |
| SPT <sup>†</sup> positive at 6m or 2 yrs                        | 17/147 (11.6%)  | 25/141 (17.7%)  | 0.61 (0.31-1.18)  | 0.14     |
| • cows' milk                                                    | 1/147 (0.7%)    | 6/141 (4.3%)    | 0.15 (0.02-1.30)  | 0.062    |
| • egg                                                           | 8/147 (5.4%)    | 16/141 (11.3%)  | 0.45 (0.19-1.09)  | 0.070    |
| • house dust mite                                               | 9/147 (6.1%)    | 9/141 (6.4%)    | 0.96 (0.37-2.48)  | 0.93     |
| • cat                                                           | 3/147 (2.0%)    | 5/141 (3.5%)    | 0.57 (0.13-2.42)  | 0.44     |
| • grass                                                         | 2/147 (1.4%)    | 1/141 (0.7%)    | 1.93 (0.17-21.54) | 0.59     |
| Skin                                                            |                 |                 |                   |          |
| • Atopic eczema at 6 m                                          | 4/129 (3.1%)    | 10/122 (8.2%)   | 0.36 (0.11-1.18)  | 0.079    |
| • Severity of eczema at 6 m clinic <sup>‡</sup> ; median, (IQR) | 14.5 (7.4-19.1) | 14.4 (9.4-24.9) | N/A               | 0.44     |
| • Atopic eczema at 2 yrs                                        | 9/147 (6.1%)    | 16/141 (11.3%)  | 0.51 (0.22-1.20)  | 0.12     |
| • Severity of eczema at 2 yr clinic <sup>‡</sup> ; median (IQR) | 11.1 (7.2-24.8) | 11.1 (7.2-17.8) | N/A               | 0.52     |
| • All reported eczema <sup>§¶</sup>                             | 65/179 (36.3%)  | 65/183 (35.5%)  | 1.04 (0.67-1.59)  | 0.88     |
| • Received topical steroid preparation                          | 26/179 (14.5%)  | 31/186 (16.7%)  | 0.85 (0.48-1.50)  | 0.57     |
| Respiratory                                                     |                 |                 |                   |          |
| • All reported asthma <sup>¶</sup>                              | 20/165 (12.1%)  | 15/165 (9.1%)   | 1.38 (0.68-2.80)  | 0.37     |
| • Night time cough                                              | 134/179 (74.9%) | 139/186 (74.7%) | 1.01 (0.63-1.62)  | 0.98     |
| • Night or daytime cough                                        | 152/179 (84.9%) | 158/186 (84.9%) | 1.00 (0.56-1.77)  | 0.99     |
| • Wheezing without symptoms of a virus infection                | 41/179 (22.9%)  | 41/186 (22.0%)  | 1.05 (0.64-1.72)  | 0.84     |
| • Inhaled bronchodilator or steroid                             | 24/179 (13.4%)  | 20/186 (10.8%)  | 1.29 (0.68-2.42)  | 0.44     |
| • Allergic rhinitis <sup>¶</sup>                                | 8/161 (5.0%)    | 10/167 (6.0%)   | 0.82 (0.32-2.14)  | 0.69     |
| • Sneezing and/or snuffling                                     | 175/179 (97.8%) | 177/186 (95.2%) | 2.22 (0.57-7.36)  | 0.18     |
| Any reported food allergy <sup>¶</sup>                          | 20/167 (12.0%)  | 28/169 (16.6%)  | 0.69 (0.37-1.27)  | 0.23     |

*Note 1:* This table gives the number of participants (%) unless otherwise stated

\*Chi squared test for contingency tables or Fisher's Exact test\* where expected values were <5

†SPT (skin prick test) valid if diameter of wheal for the positive control was ≥1mm than diameter for the negative control; SPT positive if diameter of wheal for antigen was ≥3mm than diameter for negative control

‡SCORAD<sup>18</sup>

§of any duration

¶whether or not diagnosed by a health professional
